# Supplementary material for: Mountain gorillas maintain strong affiliative biases for maternal siblings despite high male reproductive skew and extensive exposure to paternal kin
Source: eLife journal article supplement (doi:10.7554/elife.80820), 2022-09-22
Supplement: figures [file elife-80820-figures-v2.pdf]

---

## Figures and figure supplements

Mountain gorillas maintain strong affiliative biases for maternal siblings despite high male reproductive skew and extensive exposure to paternal kin

**Nicholas M Grebe et al**

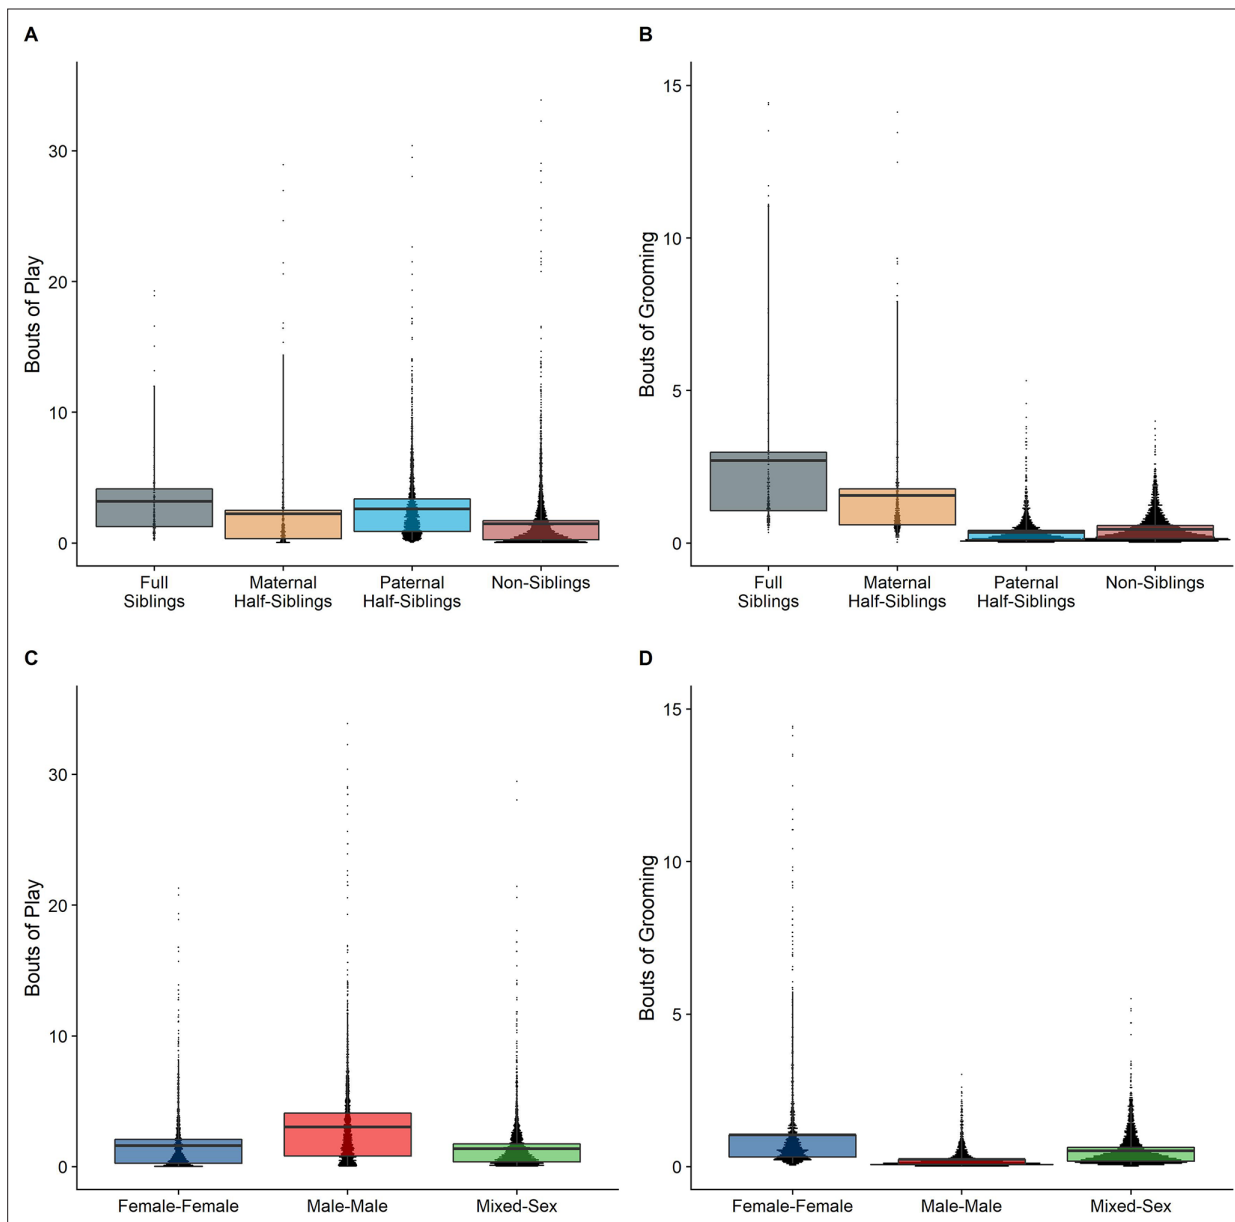

**Figure 1.** Box and dot plots comparing relatedness categories (A, B) and sex categories (C, D) for play rates (left) and grooming rates (right).

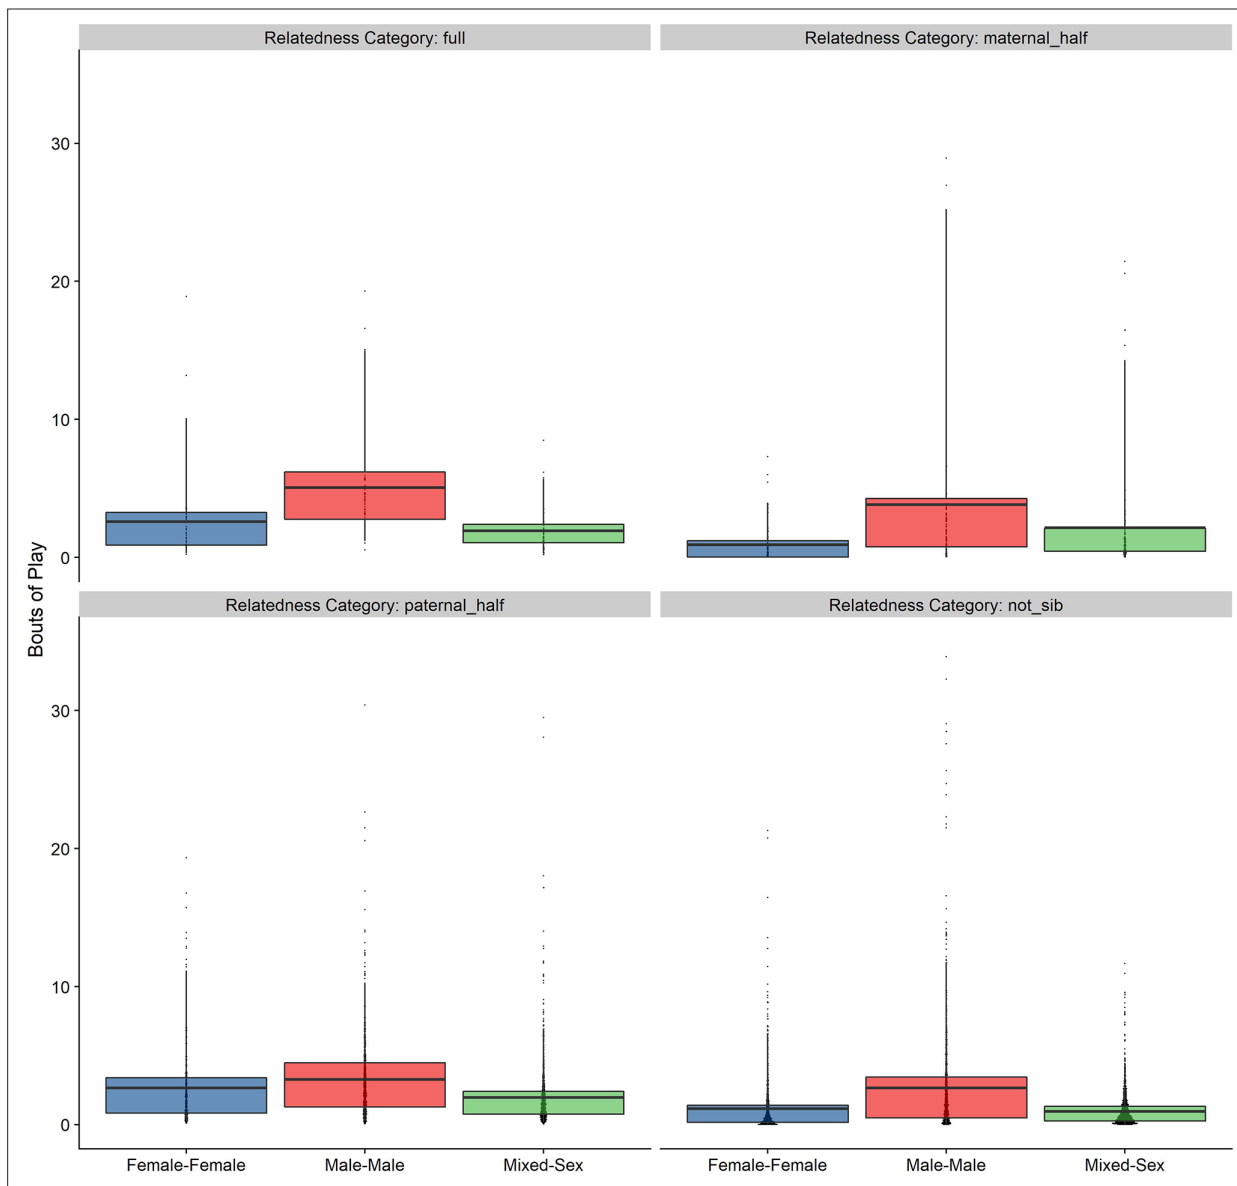

**Figure 1—figure supplement 1.** Box and dot plots for play within gorilla dyads that have 'early life familiarity' only (n=6724), separated by relatedness and sex category.

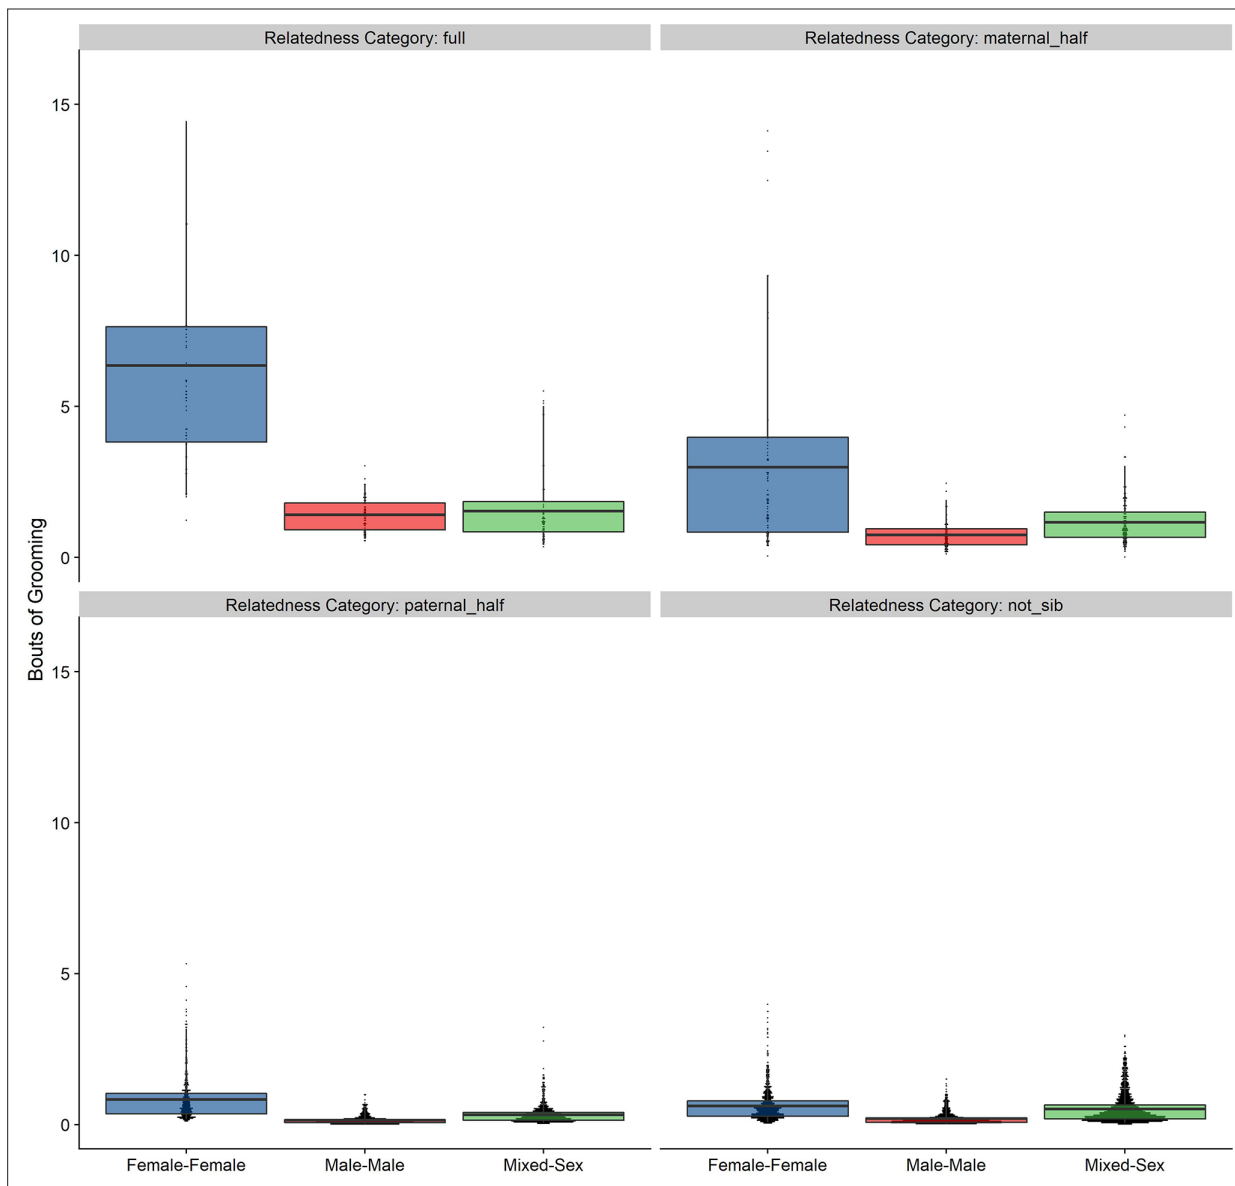

**Figure 1—figure supplement 2.** Box and dot plots for grooming within gorilla dyads that have ‘early life familiarity’ only (n=6724), separated by relatedness and sex category.

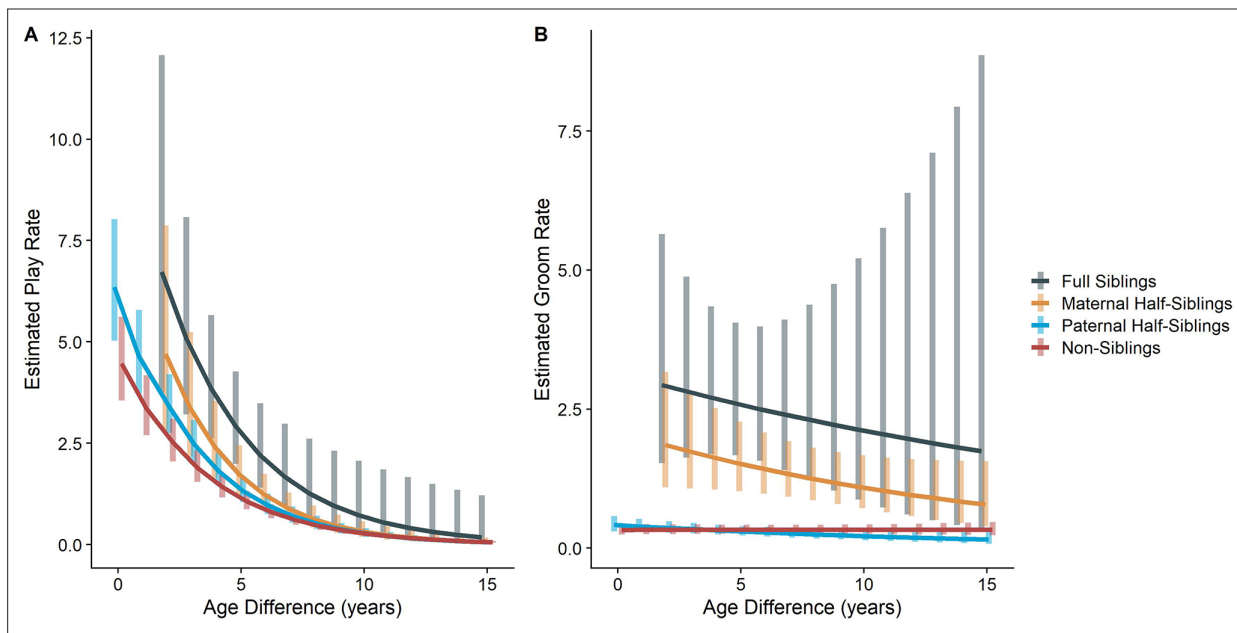

**Figure 2.** Estimated rates of play (A) and grooming (B) across a range of age differences, separated by relatedness category. Bars represent 95% CI for rates of behavior at a given age difference.

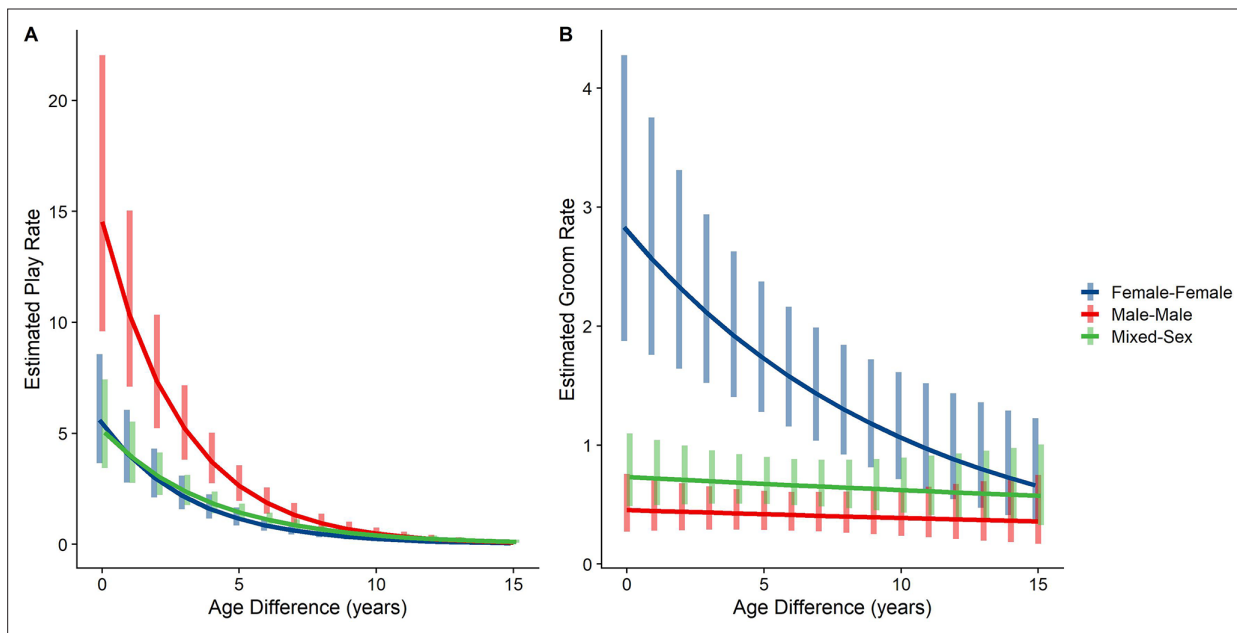

**Figure 3.** Estimated rates of play (A) and grooming (B) across a range of age differences, separated by sex category. Bars represent 95% CI for rates of behavior at a given age difference.

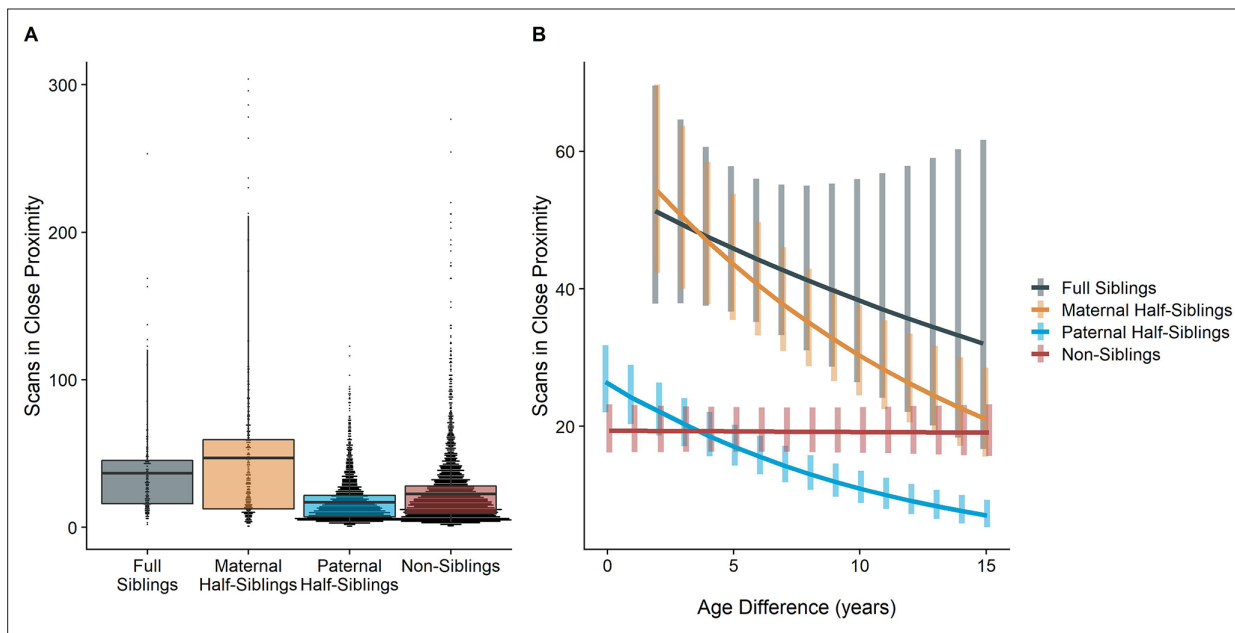

**Figure 4.** Box and dot plots (A) and estimated trends across a range of age differences (B) for the time gorilla dyads spent in close proximity, separated by relatedness category. Bars in (B) represent 95% CI for rates of proximity at a given age difference.

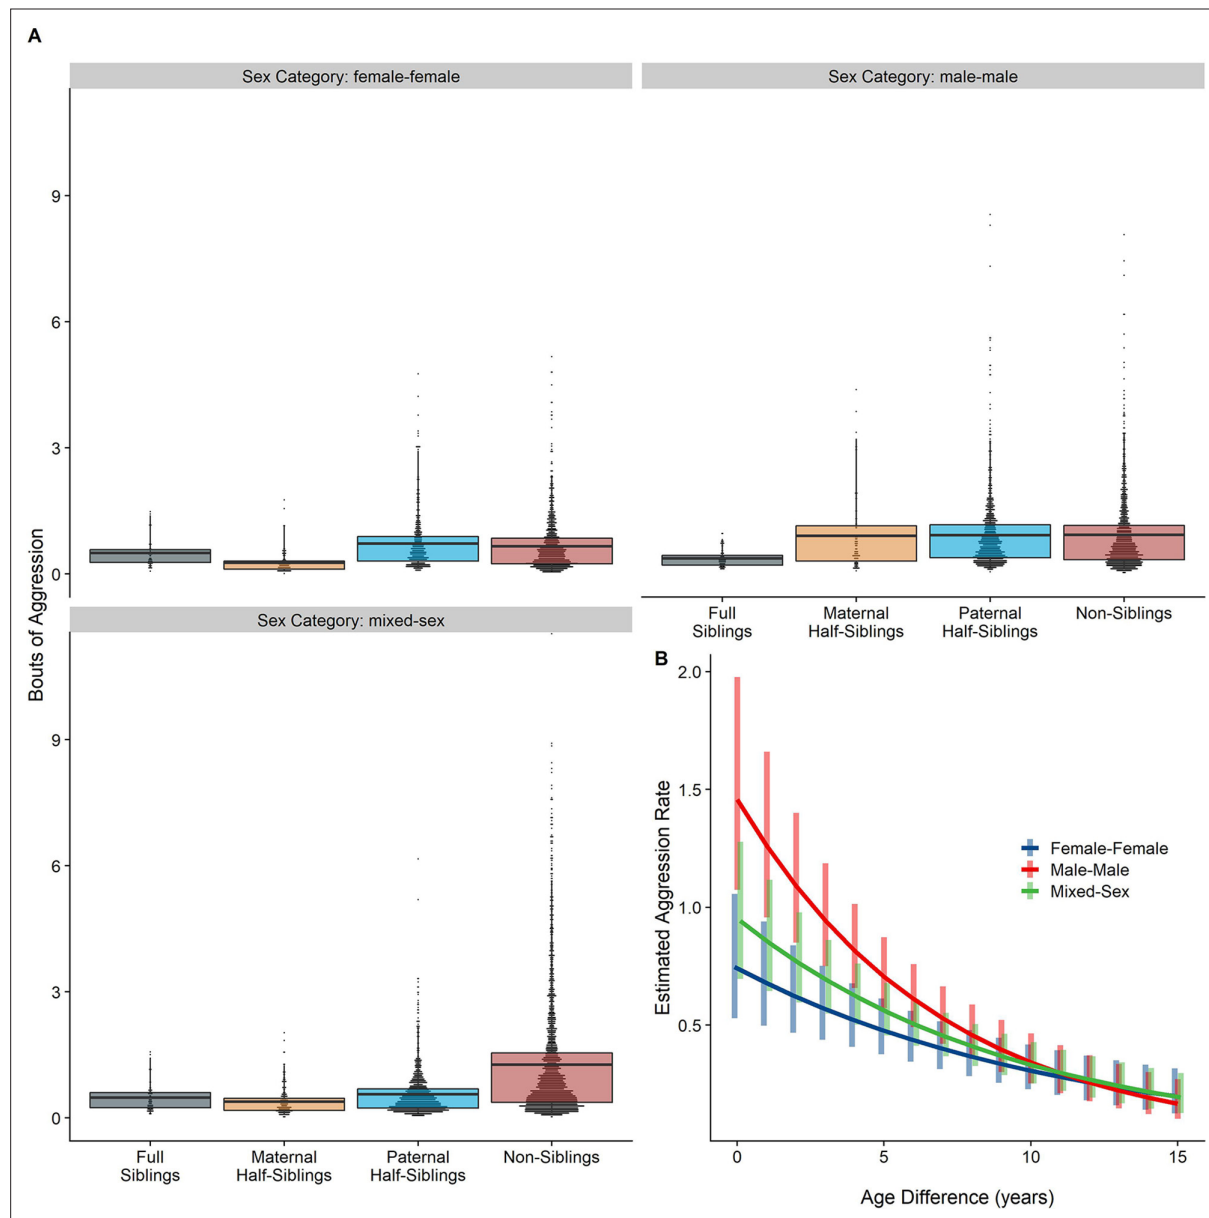

**Figure 5.** Box and dot plots (A) and estimated trends across a range of age differences (B) for aggression within gorilla dyads, separated by relatedness and sex category. Bars in (B) represent 95% CI for rates of aggression at a given age difference.



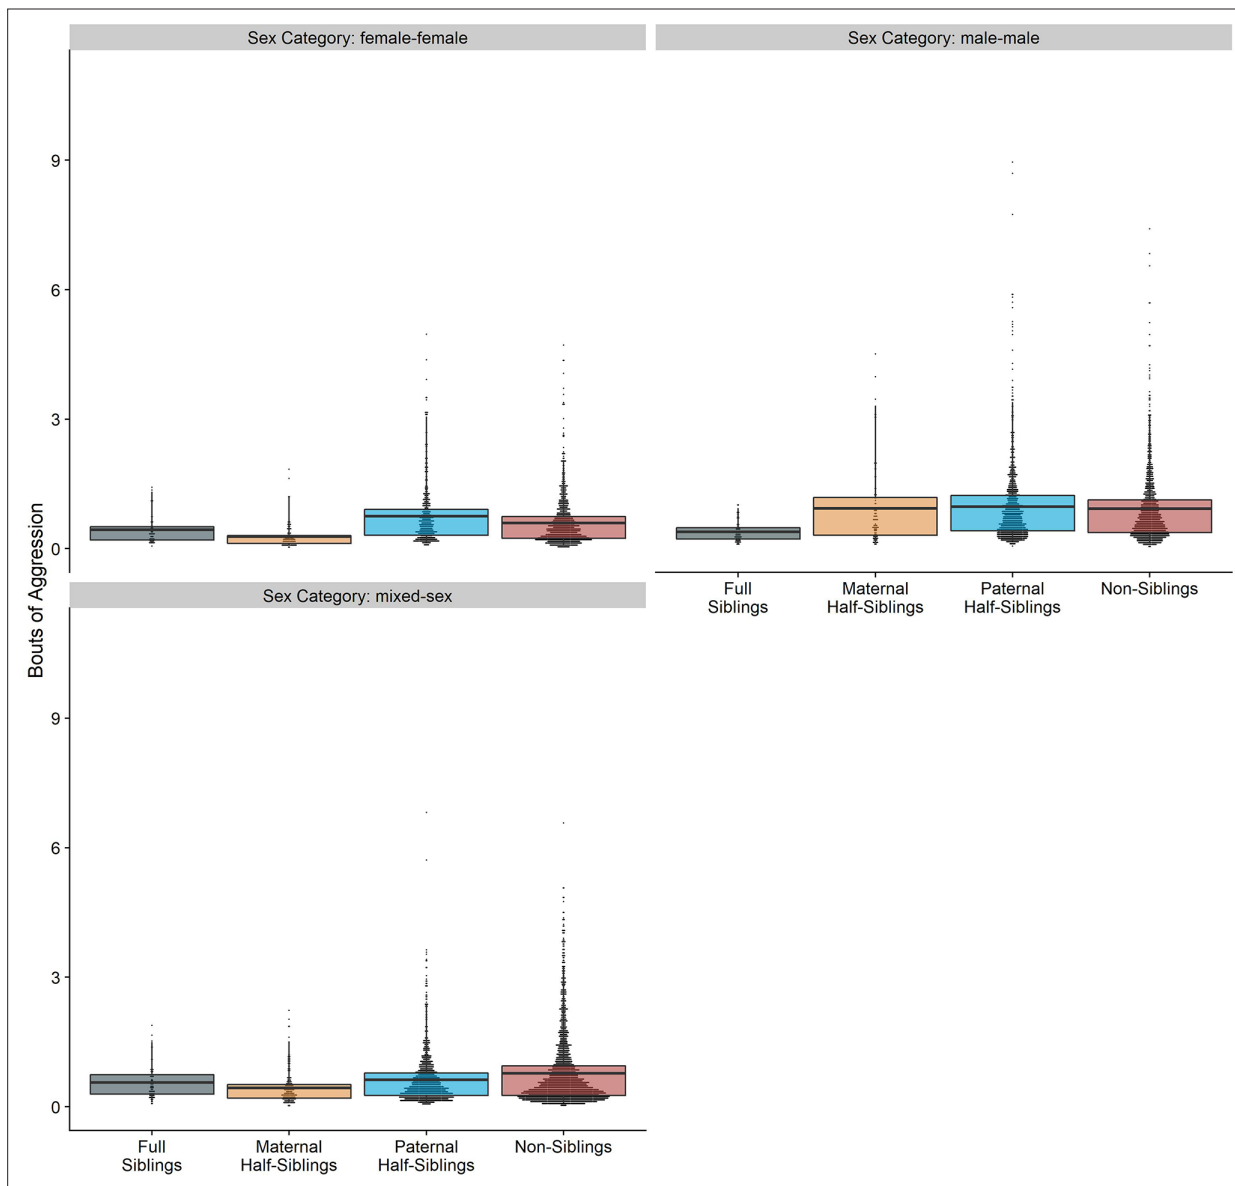

**Figure 5—figure supplement 1.** Box and dot plots for aggression within gorilla dyads that have ‘early life familiarity’ only ( $n=6724$ ), separated by relatedness and sex category.

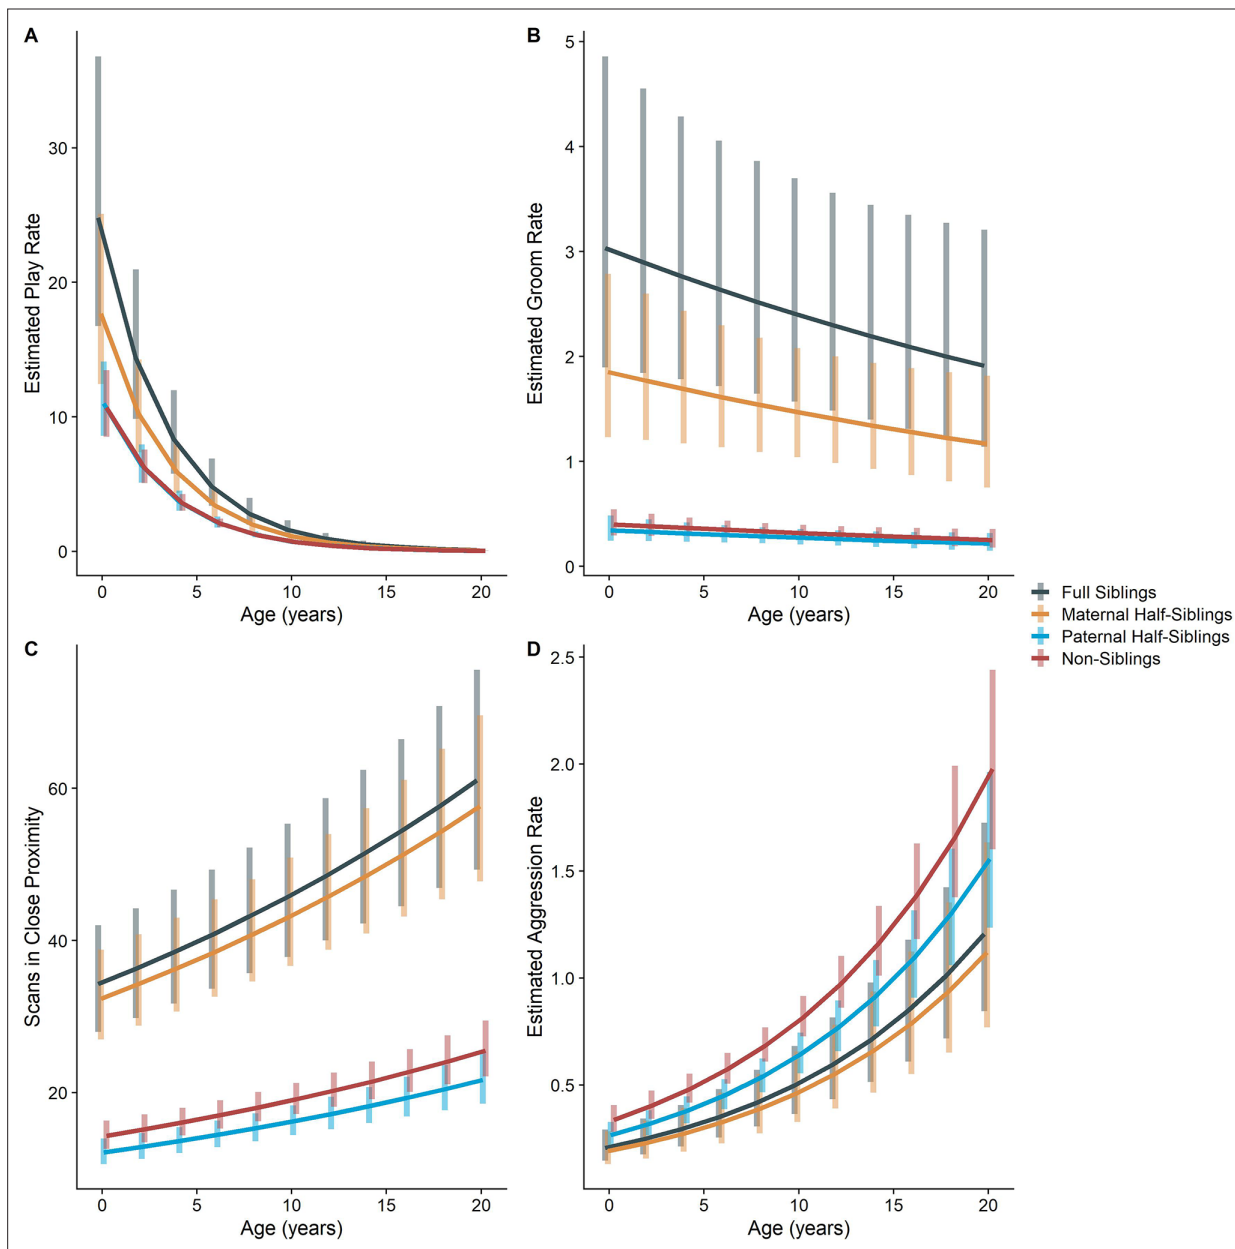

**Appendix 3—figure 1.** Estimated trends of (A) play, (B) grooming, (C) close proximity, and (D) aggression across average age of gorilla dyads. Trends adjusted for all parameters listed in **Appendix 3—table 1**. Bars represent 95% CI for rates of behavior at a given age .

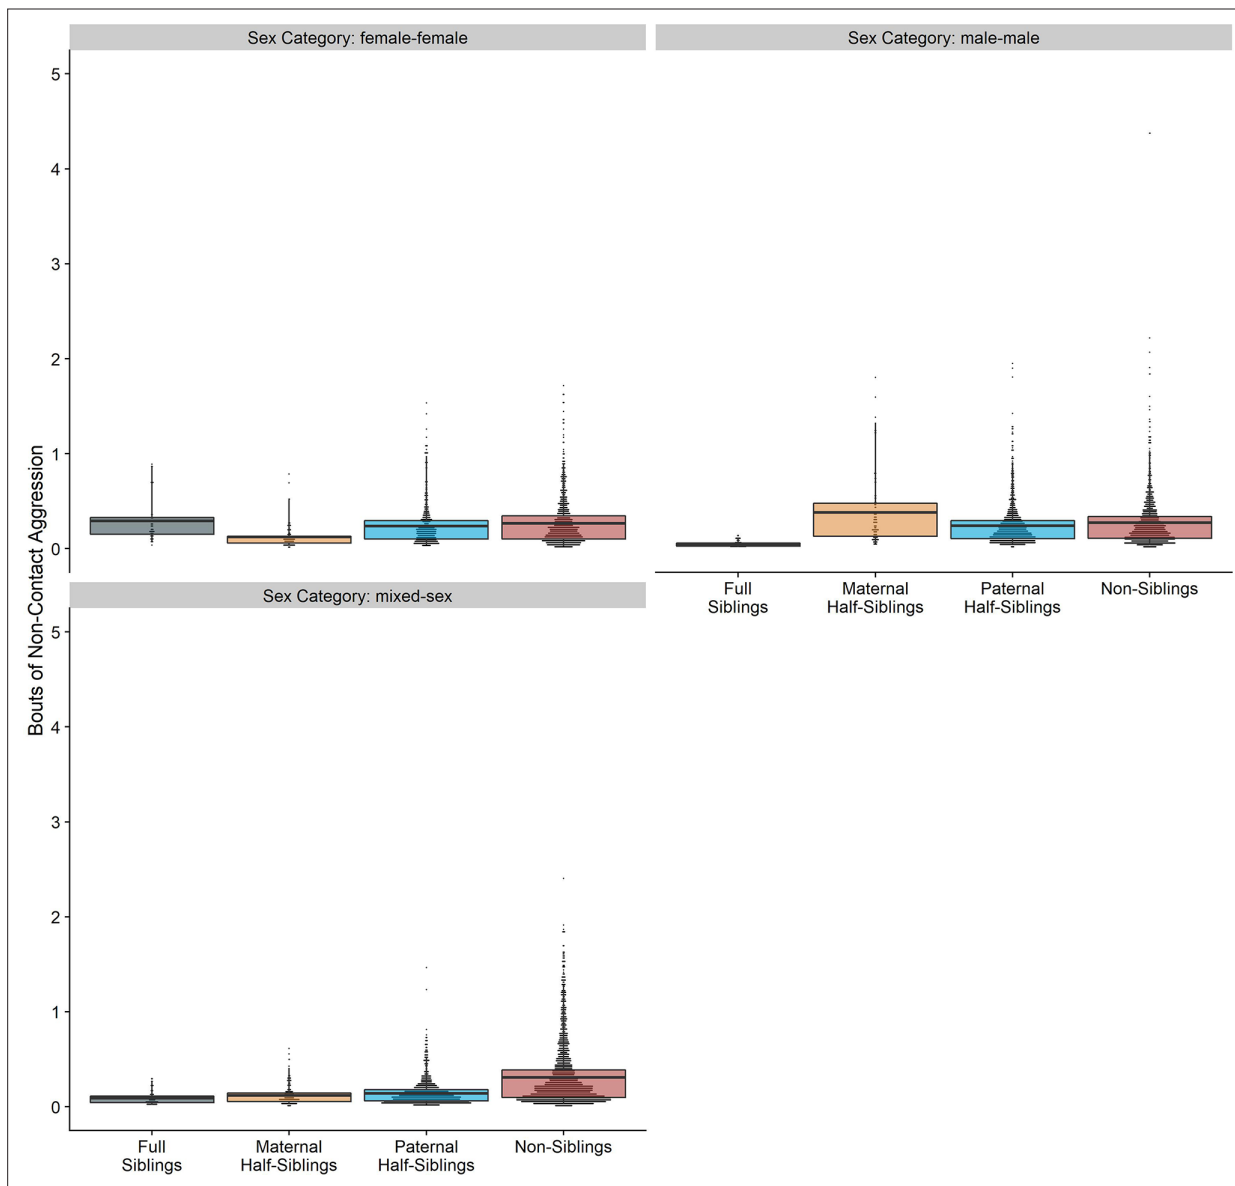

**Appendix 4—figure 1.** Box and dot plots showing estimated non-contact aggression within gorilla dyads, separated by relatedness and sex category.

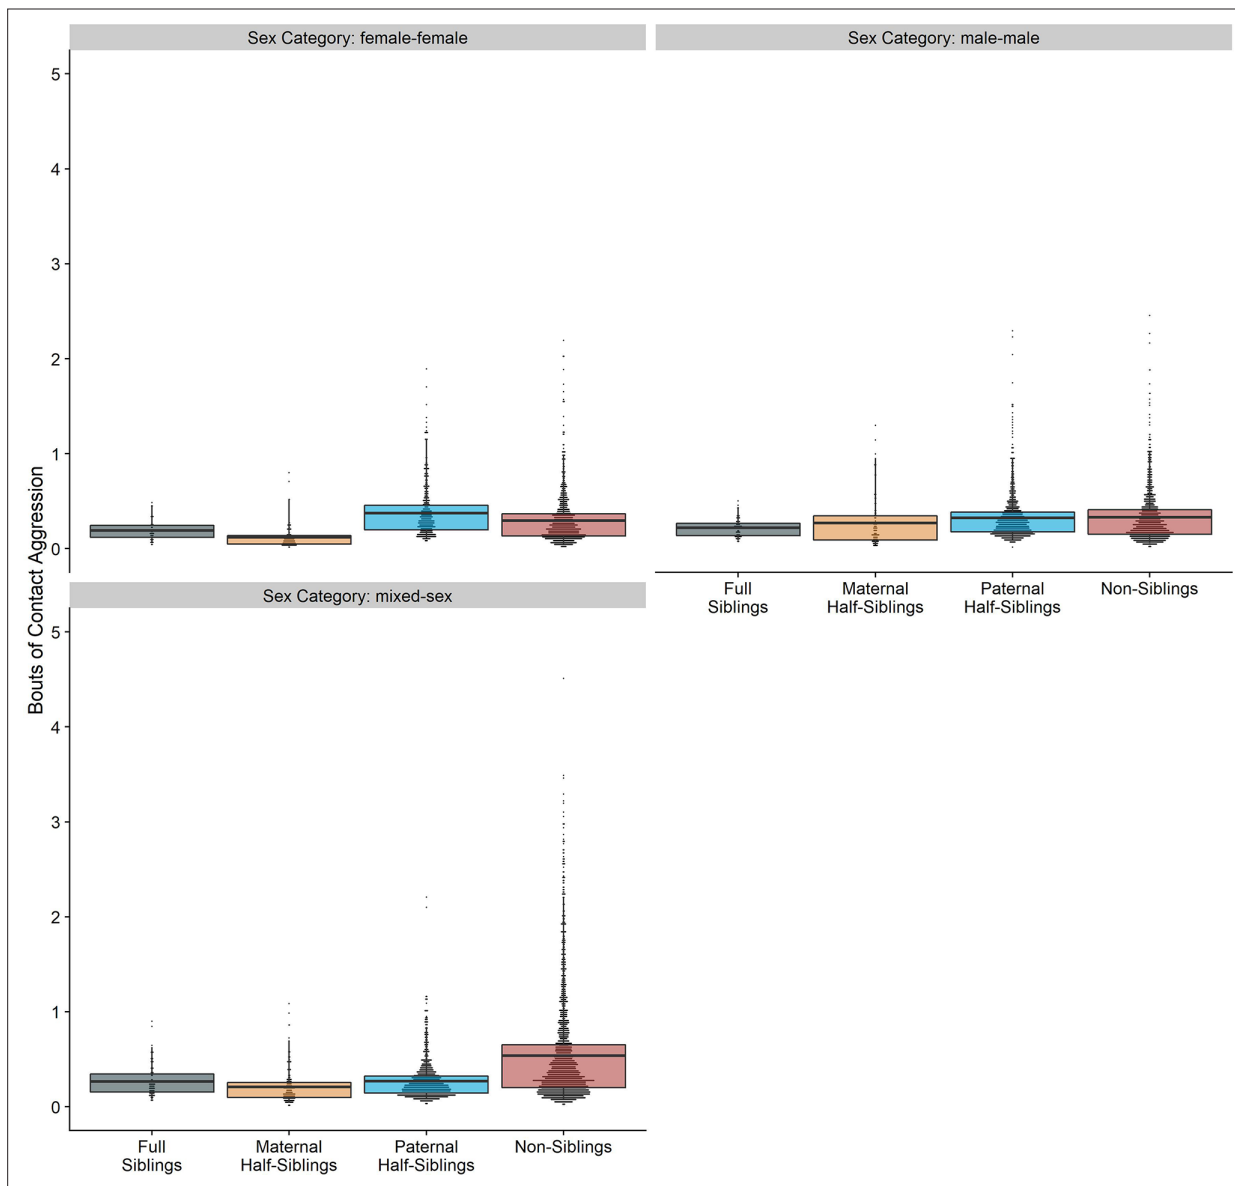

**Appendix 4—figure 2.** Box and dot plots showing estimated contact aggression within gorilla dyads, separated by relatedness, and sex category.
